# Supplementary material for: The Reality of Lung Cancer Paradox: The Impact of Body Mass Index on Long-Term Survival of Resected Lung Cancer. A French Nationwide Analysis from the Epithor Database
Source: MDPI journal article supplement (doi:10.3390/cancers13184574), 2021-09-12
Supplement: s1 [file s1]

**Epithor Group: Centers participating in the Epithor database.**

| <b>Team Leader</b>          | <b>Institution</b>                                                                        |
|-----------------------------|-------------------------------------------------------------------------------------------|
| Pascal Thomas               | Thoracic Surgery Department – Hopital Nord, Marseille                                     |
| Brouchet Laurent            | Thoracic Surgery Department – Hopital Larrey, Toulouse                                    |
| Pierre-Emmanuel Falcoz      | Thoracic Surgery Department – Hopitaux Universitaires De Strasbourg, Nouvel Hopital Civil |
| Francoise Le Pimpec-Barthes | Thoracic Surgery Department – Hopital Europeen Georges Pompidou                           |
| Eric Steinmetz              | Thoracic Surgery Department – CHU Bocage Central                                          |
| Jacques Jougon              | Thoracic Surgery Department – Hopital Cardiologique Du Haut Leveque CHU De Bordeaux       |
| Marc Filaire                | Thoracic Surgery Department – Centre Jean Perrin                                          |
| Valentine Anne              | Thoracic Surgery Department – Hopitaux Prives De Metz, Site Robert Schuman                |
| Jerome Mouroux              | Thoracic Surgery Department – Hopital Pasteur                                             |
| Joelle Siat                 | Thoracic Surgery Department – Hopital De Brabois, CRHU De Nancy                           |
| Christophe Peillon          | Thoracic Surgery Department – Hopital Charles Nicolle                                     |
| Serge Hauptert              | Thoracic Surgery Department – Hopital Henri Duffaut, Centre Hospitalier De La Durance     |
| Michel Aupart               | Thoracic Surgery Department – Hopital Trousseau                                           |
| Antoine Dujon               | Thoracic Surgery Department – Clinique Du Cedre                                           |
| Pierre Alric                | Thoracic Surgery Department – Hopital Arnaud De Villeneuve                                |
| Gil Frey                    | Thoracic Surgery Department – Centre Hospitalier Universitaire Grenoble Alpes             |
| Eric De La Roche            | Thoracic Surgery Department – Infermiere Protestante                                      |
| Philippe Boitet             | Thoracic Surgery Department – Hopital Privé De L' Estuaire                                |
| Nicolas Meneveau            | Thoracic Surgery Department – CHU Jean Minjoz                                             |
| Axel Aubert                 | Thoracic Surgery Department – Linique Belledonne                                          |
| Jean Philippe Arigon        | Thoracic Surgery Department – Clinique Saint Augustin                                     |
| Christian Dromer            | Thoracic Surgery Department – Polyclinique Bordeaux Nord-Aquitaine                        |
| Pierre Corbi                | Thoracic Surgery Department – CHU De Poitiers – Site De La Milétrie                       |
| Michel Alauzen              | Thoracic Surgery Department – Clinique Du Millenaire                                      |
| Eric Mensier                | Thoracic Surgery Department – Hopital Prive La Louvière                                   |
| Dominique Gossot            | Thoracic Surgery Department – Institute Mutualiste Mountsouris                            |
| Lotfi Benhamed              | Thoracic Surgery Department – Centre Hospitalier De Valenciennes                          |
| Marco Alifano               | Thoracic Surgery Department – Hopital Cochin, Hopitaux Universitaires Paris Centre        |
| Sebastien Franco            | Thoracic Surgery Department – Centre Hospitalier Saint-Louis                              |
| Francis Faroy               | Thoracic Surgery Department – Centre Hospitalier Privé Saint-Martin                       |
| Jalal Assouad               | Thoracic Surgery Department – Hopital Tenon, Hopitaux Universitaires Est Paris            |
| Eric Mensier                | Thoracic Surgery Department – Polyclinique Du Bois                                        |
| Gilles Grosdidier           | Thoracic Surgery Department – Polyclinique De Gentilly                                    |
| Pascal Berna                | Thoracic Surgery Department – CHU Amiens Picardie, Site Sud                               |
| Babak Sadeghi-Looyeh        | Thoracic Surgery Department – Clinique Du Ter                                             |
| Jean-Philippe Avaro         | Thoracic Surgery Department – Hopital D'instruction Des Armées Sainte- Anne               |
| Olivier Tiffet              | Thoracic Surgery Department – Hopital Nord CHU, Saint-Etienne                             |
| Eric Cheysson               | Thoracic Surgery Department – Centre Hospitalier René Dubos                               |
| Elie Fadel                  | Thoracic Surgery Department – Centre Chirurgical Marie Lannelongue                        |
| Pierre Fourquier            | Thoracic Surgery Department – Hopital Privé Du Confluent                                  |
| Florence Mazeres            | Thoracic Surgery Department – Centre Hospitalier De La Cote Basque                        |
| Frederique Clerc            | Thoracic Surgery Department – Clinique Belharra                                           |
| Alain Chapelier             | Thoracic Surgery Department – Hopital Foch                                                |
| Luciano Eraldi              | Thoracic Surgery Department – Clinique Ambroise Paré                                      |
| Vincent Blin                | Thoracic Surgery Department – Hopital Privé Océane                                        |
| Marion Durand               | Thoracic Surgery Department – Hopital Privé d'Antony                                      |
| Bernard Lenot               | Thoracic Surgery Department – Centre Hospitalier Yves Le Foll                             |
| Cedric Perrotin             | Thoracic Surgery Department – Clinique Saint-George                                       |
| Fady Francis                | Thoracic Surgery Department – Capio, Clinique Des Cédres                                  |
| Antonio Minniti             | Thoracic Surgery Department – Centre Hospitalier De Pau, Hospital Francois Mitterrand     |
| Eric Marcadé                | Thoracic Surgery Department – Centre Hospitalier Privé Saint- Grégoire                    |
| Jean-Louis Mornex           | Thoracic Surgery Department – Hopital Cardio-Vasculaire Et Pneumologique Louis Pradel     |
| Gilles Cardot               | Thoracic Surgery Department – Hopital Duchenne CHG                                        |
| Mayeul Tabutin              | Thoracic Surgery Department – Centre Léon Bérard                                          |
| Eric De La Roche            | Thoracic Surgery Department – Clinique De La Sauvegarde                                   |
| Olivier Chataigner          | Thoracic Surgery Department – Polyclinique De Courlancy                                   |
| Vito-Giovanni Ruggeri       | Thoracic Surgery Department – Hopital Robert Debré                                        |

|                              |                                                                                                |
|------------------------------|------------------------------------------------------------------------------------------------|
| Florent Charot               | Thoracic Surgery Department – Nouvelle Clinique De L’union                                     |
| Bertrand Richard De Latour   | Thoracic Surgery Department – Polyclinique Saint-Laurent                                       |
| Alain Prat                   | Thoracic Surgery Department – Hopital Calmette                                                 |
| Patrick Bagan                | Thoracic Surgery Department – Centre Hospitalier Victor Dupouy                                 |
| Xavier Ducrocq               | Thoracic Surgery Department – Rhéna, Clinique De Strasbourg                                    |
| Pierre-Mathieu Bonnet        | Thoracic Surgery Department – Hopital Européen                                                 |
| Philippe Rudondy             | Thoracic Surgery Department – Hopital Saint-Joseph,                                            |
| Bastien Orsini               | Thoracic Surgery Department – Centre Hospitalier Privé Clairval                                |
| Antoine Guerlin              | Thoracic Surgery Department – Clinique Esquirol-Saint Hilaire                                  |
| Jean-Louis Fasquel           | Thoracic Surgery Department – Polyclinique Quimper Sud                                         |
| John-Tarun Mac Bride Windsor | Thoracic Surgery Department – Hopital D’instruction Des Armées Percy                           |
| Emmanuel Martinod            | Thoracic Surgery Department – Hopital Avicenne                                                 |
| Christophe Lancelin          | Thoracic Surgery Department – Clinique Du Grand Large                                          |
| Philippe Concina             | Thoracic Surgery Department – Centre Hospitalier De Perpignan                                  |
| Bruno Tremblay               | Thoracic Surgery Department – Centre Hospitalier De Meaux, GHEF (Grand Hopital Est Francilien) |
| Alain Brachet                | Thoracic Surgery Department – Hopital Privé Saint-Marie                                        |
| Pierre Riera                 | Thoracic Surgery Department – Centre Hospitalier Du Pays D’Aix                                 |
| Christophe Berton            | Thoracic Surgery Department – Pole Santé Oréliance                                             |
| Arnaud Piquard               | Thoracic Surgery Department – CHR d’Orléans                                                    |
| Joaquin Dominguez            | Thoracic Surgery Department – Centre Cardiologique De Nord                                     |
| Philippe Lacroix             | Thoracic Surgery Department – CHU Dupuytren                                                    |
| Eric Brechet                 | Thoracic Surgery Department – Polyclinique De Limoges-Site Emailleurs Colombier                |
| Patrick Bagan                | Thoracic Surgery Department – Centre Hospitalier Victor Dupoy                                  |
| Philippe Keller              | Thoracic Surgery Department – Centre Hospitalier Louis Pasteur                                 |
| Philippe Dalous              | Thoracic Surgery Department – Clinique D’occitanie                                             |
| Eric Picard                  | Thoracic Surgery Department – Centre Hospitalier Universitaire Caremeau                        |
| Hélène Loubière              | Thoracic Surgery Department – Centre Hospitalier Du Mans                                       |
| Salam Abou Taam              | Thoracic Surgery Department – Hopital Privé Claude Galien ICPS                                 |
| Yves Castier                 | Thoracic Surgery Department – Groupe Hospitalier Bichat-Claude Bernard                         |
| Gerard Pavy                  | Thoracic Surgery Department – Hopital Privé Arras Les Bonnettes                                |
| Olivier Tiffet               | Thoracic Surgery Department – Hopital Nord CHU                                                 |
| Xavier De Kerangal           | Thoracic Surgery Department – Groupe Hospitalier Du Havre- Hopital Jacques Monod               |
| Olivier Chataigner           | Thoracic Surgery Department – Clinique Victor Pauchet De Butler                                |
| René Jancovic                | Thoracic Surgery Department – Clinique Chirurgicale Du Val d’Or                                |
| Christophe Baufreton         | Thoracic Surgery Department – Centre Hospitalier Universitaire, Angers                         |
| Nicolas Chavanis             | Cardiac Surgery Department – Centre Hospitalier Annecy Genevois                                |
| Van-Manh Nguyen              | Thoracic Surgery Department – Centre Hospitalier Pierre Bérégovoy                              |

**Table S1.** Overall survival at specific timepoints. Values are percent survival with 95% confidence interval.

| Features                        | 1 month           | 3 months         | 1 year           | 3 years          | 5 years          |
|---------------------------------|-------------------|------------------|------------------|------------------|------------------|
| Overall cohort                  | 97.4 (97.2–97.5)  | 95.3 (95.1–95.4) | 87.2 (86.9–87.5) | 69.5 (69.1–69.9) | 58.4 (57.9–58.9) |
| BMI category                    |                   |                  |                  |                  |                  |
| Underweight                     | 96.0 (95.3–96.8)  | 92.5 (91.4–93.6) | 81.1 (79.4–82.8) | 61.8 (59.6–64.0) | 52.0 (49.7–54.4) |
| Normal weight                   | 97.2 (97.0–97.4)  | 94.8 (94.6–95.1) | 86.2 (85.7–86.6) | 68.7 (68.1–69.4) | 57.9 (57.2–58.6) |
| Overweight                      | 97.6 (97.4–97.8)  | 95.8 (95.5–96.1) | 88.4 (88.0–88.9) | 70.4 (69.7–71.1) | 58.7 (57.8–59.5) |
| Obesity                         | 97.6 (97.3–98.0)  | 96.3 (95.8–96.7) | 89.7 (89.0–90.4) | 72.3 (71.2–73.4) | 61.3 (60.0–62.6) |
| Sex                             |                   |                  |                  |                  |                  |
| Female                          | 98.9 (98.7–99.0)  | 98.0 (97.8–98.3) | 94.6 (94.2–95.0) | 86.3 (85.7–86.9) | 80.7 (80.0–81.5) |
| Male                            | 96.7 (96.5–96.9)  | 94.1 (93.9–94.4) | 84.3 (84.0–84.7) | 63.2 (62.7–63.8) | 50.4 (49.8–51.0) |
| Age, y                          |                   |                  |                  |                  |                  |
| ≤ 55                            | 98.6 (98.3–98.8)  | 97.2 (96.9–97.6) | 90.0 (89.4–90.7) | 74.0 (73.0–74.9) | 65.7 (64.6–66.8) |
| 56–60                           | 98.4 (98.1–98.7)  | 96.9 (96.5–97.3) | 89.5 (88.8–90.2) | 72.3 (71.2–73.3) | 61.2 (60.0–62.5) |
| 61–65                           | 97.7 (97.4–98.0)  | 95.9 (95.5–96.3) | 88.1 (87.4–88.8) | 70.4 (69.4–71.4) | 59.5 (58.4–60.7) |
| 66–70                           | 97.5 (97.2–97.8)  | 95.2 (94.8–95.6) | 86.8 (86.1–87.5) | 69.5 (68.5–70.5) | 58.5 (57.4–59.7) |
| 71–75                           | 96.7 (96.3–97.1)  | 93.9 (93.4–94.5) | 85.7 (84.9–86.5) | 67.4 (66.3–68.6) | 54.0 (52.8–55.4) |
| > 75                            | 94.8 (94.3–95.3)  | 91.8 (91.1–92.4) | 82.2 (81.3–83.1) | 62.0 (60.8–63.2) | 48.9 (47.6–50.2) |
| Charlson comorbid-<br>ity index |                   |                  |                  |                  |                  |
| 0–2                             | 98.9 (98.7–99.2)  | 97.9 (97.6–98.2) | 91.6 (91.0–92.2) | 77.4 (76.4–78.3) | 69.4 (68.2–70.5) |
| 3                               | 98.3 (98.0–98.5)  | 96.8 (96.4–97.1) | 89.5 (88.8–90.1) | 73.2 (72.2–74.2) | 63.1 (62.0–64.2) |
| 4–5                             | 97.2 (97.0–97.4)  | 94.9 (94.6–95.2) | 86.6 (86.1–87.1) | 68.4 (67.7–69.1) | 57.0 (56.3–57.8) |
| ≥ 6                             | 95.8 (95.5–96.2)  | 92.9 (92.4–93.4) | 83.5 (82.9–84.2) | 63.1 (62.2–64.0) | 49.5 (48.5–50.6) |
| Performance status              |                   |                  |                  |                  |                  |
| 0                               | 98.5 (98.4–98.7)  | 97.2 (97.0–97.5) | 91.3 (90.9–91.7) | 75.3 (74.6–75.9) | 64.7 (64.0–65.5) |
| 1                               | 97.0 (96.8–97.3)  | 94.7 (94.4–95.0) | 85.9 (85.4–86.4) | 67.3 (66.6–67.9) | 55.8 (55.1–56.6) |
| 2–4                             | 93.7 (93.0–94.4)  | 89.2 (88.3–90.1) | 76.6 (75.4–77.9) | 56.4 (54.9–57.9) | 44.6 (43.0–46.2) |
| Stage                           |                   |                  |                  |                  |                  |
| 0                               | 99.4 (98.3–100.0) | 96.9 (94.3–99.6) | 93.6 (89.8–97.5) | 80.2 (73.7–87.3) | 68.4 (60.0–78.0) |
| I                               | 98.2 (98.0–98.4)  | 96.9 (96.7–97.2) | 93.0 (92.6–93.4) | 80.1 (79.5–80.7) | 68.9 (68.1–69.6) |
| II                              | 97.3 (96.9–97.6)  | 94.9 (94.3–95.4) | 85.6 (84.7–86.4) | 65.5 (64.3–66.7) | 53.6 (52.2–55.0) |
| III                             | 96.3 (95.9–96.7)  | 93.1 (92.6–93.7) | 79.4 (78.5–80.3) | 53.9 (52.7–55.1) | 42.3 (41.1–43.6) |
| IV                              | 96.8 (96.0–97.5)  | 92.7 (91.6–93.8) | 75.1 (73.3–77.0) | 46.7 (44.5–49.0) | 36.3 (34.1–38.6) |
| Surgical procedure              |                   |                  |                  |                  |                  |
| Pneumonectomy                   | 94.1 (93.4–94.7)  | 90.0 (89.2–90.8) | 75.7 (74.5–76.9) | 53.7 (52.3–55.2) | 44.0 (42.5–45.5) |
| Other                           | 97.7 (97.6–97.9)  | 95.9 (95.7–96.1) | 88.6 (88.3–88.9) | 71.4 (70.9–71.8) | 60.1 (59.6–60.6) |
| Side                            |                   |                  |                  |                  |                  |
| Right                           | 97.1 (96.9–97.2)  | 94.9 (94.7–95.2) | 87.1 (86.7–87.5) | 70.0 (69.4–70.6) | 59.3 (58.6–59.9) |
| Left                            | 97.8 (97.6–98.0)  | 95.7 (95.4–96.0) | 87.3 (86.9–87.8) | 68.7 (68.1–69.4) | 57.1 (56.4–57.9) |

**Table S2.** Association of body mass index categories with survival in the original data without imputation. Results presented are hazard ratios with 95% confidence intervals. In these analyses, missing data were not imputed, and only available cases were analysed.

| Features                                                     | Unadjusted<br><i>n</i> = 54,592<br>Deaths = 17,075 | Model 1<br><i>n</i> = 54,237<br>Deaths = 16,984 | Model 2<br><i>n</i> = 48,002<br>Deaths = 14,827 | Model 3 *<br><i>n</i> = 37,674<br>Deaths = 11,543 |
|--------------------------------------------------------------|----------------------------------------------------|-------------------------------------------------|-------------------------------------------------|---------------------------------------------------|
| BMI category                                                 |                                                    |                                                 |                                                 |                                                   |
| Underweight                                                  | 1.24 (1.16–1.33)                                   | 1.60 (1.49–1.72)                                | 1.49 (1.38–1.61)                                | 1.48 (1.36–1.62)                                  |
| Normal weight                                                | 1 (reference)                                      | 1 (reference)                                   | 1 (reference)                                   | 1 (reference)                                     |
| Overweight                                                   | 0.95 (0.92–0.98)                                   | 0.81 (0.79–0.84)                                | 0.84 (0.81–0.87)                                | 0.84 (0.81–0.88)                                  |
| Obesity                                                      | 0.87 (0.83–0.92)                                   | 0.79 (0.75–0.83)                                | 0.80 (0.76–0.84)                                | 0.83 (0.78–0.87)                                  |
| Period                                                       |                                                    |                                                 |                                                 |                                                   |
| 2003–2006                                                    | —                                                  | 1 (reference)                                   | 1 (reference)                                   | 1 (reference)                                     |
| 2007–2010                                                    | —                                                  | 0.92 (0.88–0.97)                                | 0.94 (0.89–0.99)                                | 0.96 (0.90–1.01)                                  |
| 2011–2014                                                    | —                                                  | 0.93 (0.89–0.98)                                | 0.98 (0.93–1.03)                                | 1.01 (0.95–1.07)                                  |
| 2015–2017                                                    | —                                                  | 1.00 (0.95–1.04)                                | 1.08 (1.02–1.14)                                | 1.12 (1.06–1.19)                                  |
| Sex, no. (%)                                                 |                                                    |                                                 |                                                 |                                                   |
| Female                                                       | —                                                  | 1 (reference)                                   | 1 (reference)                                   | 1 (reference)                                     |
| Male                                                         | —                                                  | 3.08 (2.94–3.23)                                | 2.78 (2.64–2.92)                                | 2.78 (2.63–2.94)                                  |
| Age (per decade)                                             | —                                                  | 1.07 (1.05–1.10)                                | 1.07 (1.04–1.09)                                | 1.10 (1.07–1.12)                                  |
| Charlson comorbidity index (per point until a score of 6 **) | —                                                  | 1.12 (1.10–1.13)                                | 1.09 (1.08–1.11)                                | 1.10 (1.08–1.11)                                  |
| Performance status                                           |                                                    |                                                 |                                                 |                                                   |
| 0                                                            | —                                                  | —                                               | 1 (reference)                                   | 1 (reference)                                     |
| 1                                                            | —                                                  | —                                               | 1.20 (1.15–1.24)                                | 1.16 (1.12–1.21)                                  |
| 2–4                                                          | —                                                  | —                                               | 1.65 (1.57–1.74)                                | 1.59 (1.49–1.68)                                  |
| Surgical procedure                                           |                                                    |                                                 |                                                 |                                                   |
| Pneumonectomy                                                | —                                                  | 1.75 (1.67–1.82)                                | 1.69 (1.61–1.77)                                | 1.27 (1.20–1.34)                                  |
| Other                                                        | —                                                  | 1 (reference)                                   | 1 (reference)                                   | 1 (reference)                                     |
| Side                                                         |                                                    |                                                 |                                                 |                                                   |
| Right                                                        | —                                                  | 1 (reference)                                   | 1 (reference)                                   | 1 (reference)                                     |
| Left                                                         | —                                                  | 0.98 (0.95–1.01)                                | 0.98 (0.95–1.01)                                | 0.97 (0.94–1.01)                                  |
| Histology                                                    |                                                    |                                                 |                                                 |                                                   |
| Adenocarcinoma                                               | —                                                  | —                                               | 1 (reference)                                   | 1 (reference)                                     |
| Squamous-cell carcinoma                                      | —                                                  | —                                               | 1.05 (1.01–1.09)                                | 1.07 (1.03–1.12)                                  |
| Carcinoid tumour, typical                                    | —                                                  | —                                               | 0.19 (0.15–0.25)                                | 0.24 (0.18–0.33)                                  |
| Large-cell carcinoma, undifferentiated                       | —                                                  | —                                               | 1.40 (1.29–1.52)                                | 1.25 (1.13–1.37)                                  |
| Large-cell carcinoma, neuroendocrine                         | —                                                  | —                                               | 1.34 (1.21–1.52)                                | 1.32 (1.16–1.49)                                  |
| Carcinoid tumour, atypical                                   | —                                                  | —                                               | 0.48 (0.38–0.61)                                | 0.60 (0.46–0.78)                                  |
| Small-cell lung carcinoma                                    | —                                                  | —                                               | 1.73 (1.51–1.99)                                | 2.25 (1.73–2.92)                                  |
| Sarcomatoid carcinoma                                        | —                                                  | —                                               | 1.70 (1.46–1.99)                                | 1.52 (1.27–1.82)                                  |
| Other                                                        | —                                                  | —                                               | 1.18 (1.04–1.33)                                | 1.27 (1.10–1.46)                                  |
| Stage                                                        |                                                    |                                                 |                                                 |                                                   |
| I                                                            | —                                                  | —                                               | —                                               | 1 (reference)                                     |
| II                                                           | —                                                  | —                                               | —                                               | 1.59 (1.51–1.67)                                  |
| III                                                          | —                                                  | —                                               | —                                               | 2.35 (2.25–2.46)                                  |
| IV                                                           | —                                                  | —                                               | —                                               | 3.07 (2.88–3.29)                                  |

\* Patients with stage 0 (*n* = 81) or occult (*n* = 105) were excluded from this model. \*\* The effect of Charlson comorbidity index was capped at 6: scores above 6 were considered as associated with the same relative effect as scores of 6.
